# Supplementary material for: Discovery of New Eunicellin-Based Diterpenoids from a Formosan Soft Coral Cladiella sp
Source: Mar Drugs. 2013 Nov 14;11(11):4585–93. doi: 10.3390/md11114585 (PMC3853747; doi:10.3390/md11114585)

## Supplementary Materials

**Figure S1.**  $^1\text{H}$  NMR spectrum (500 MHz) of compound **1** in  $\text{CDCl}_3$ .

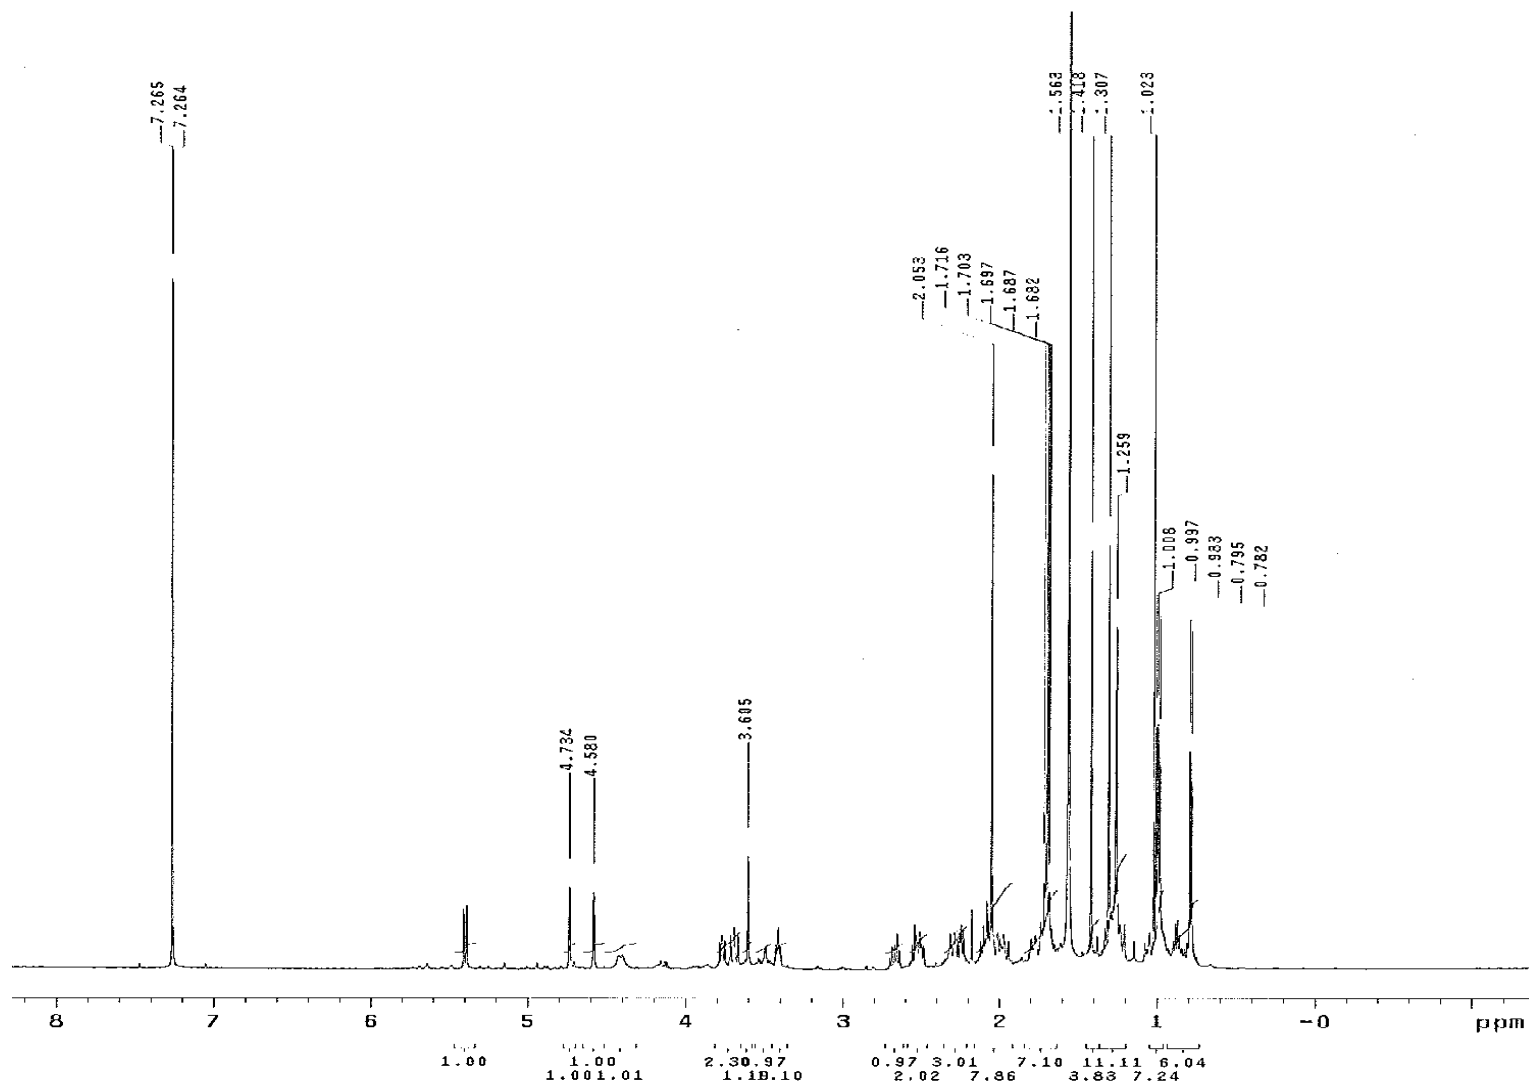

**Figure S2.**  $^{13}\text{C}$  NMR spectrum (125 MHz) of compound **1** in  $\text{CDCl}_3$ .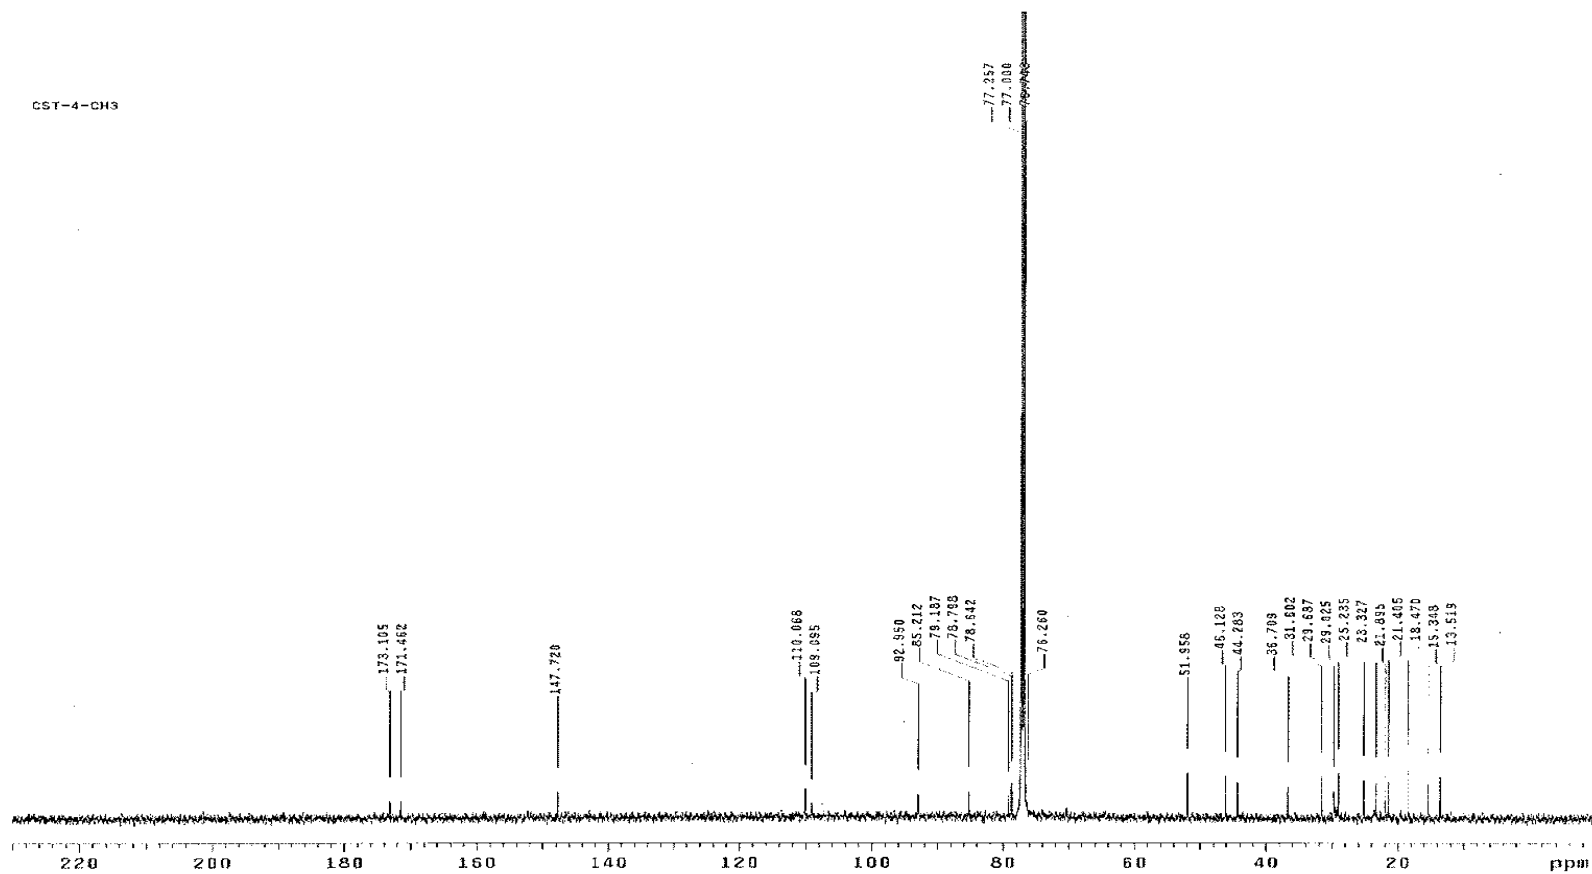

**Figure S3.** DEPT spectrum (125 MHz) of compound **1** in CDCl<sub>3</sub>.

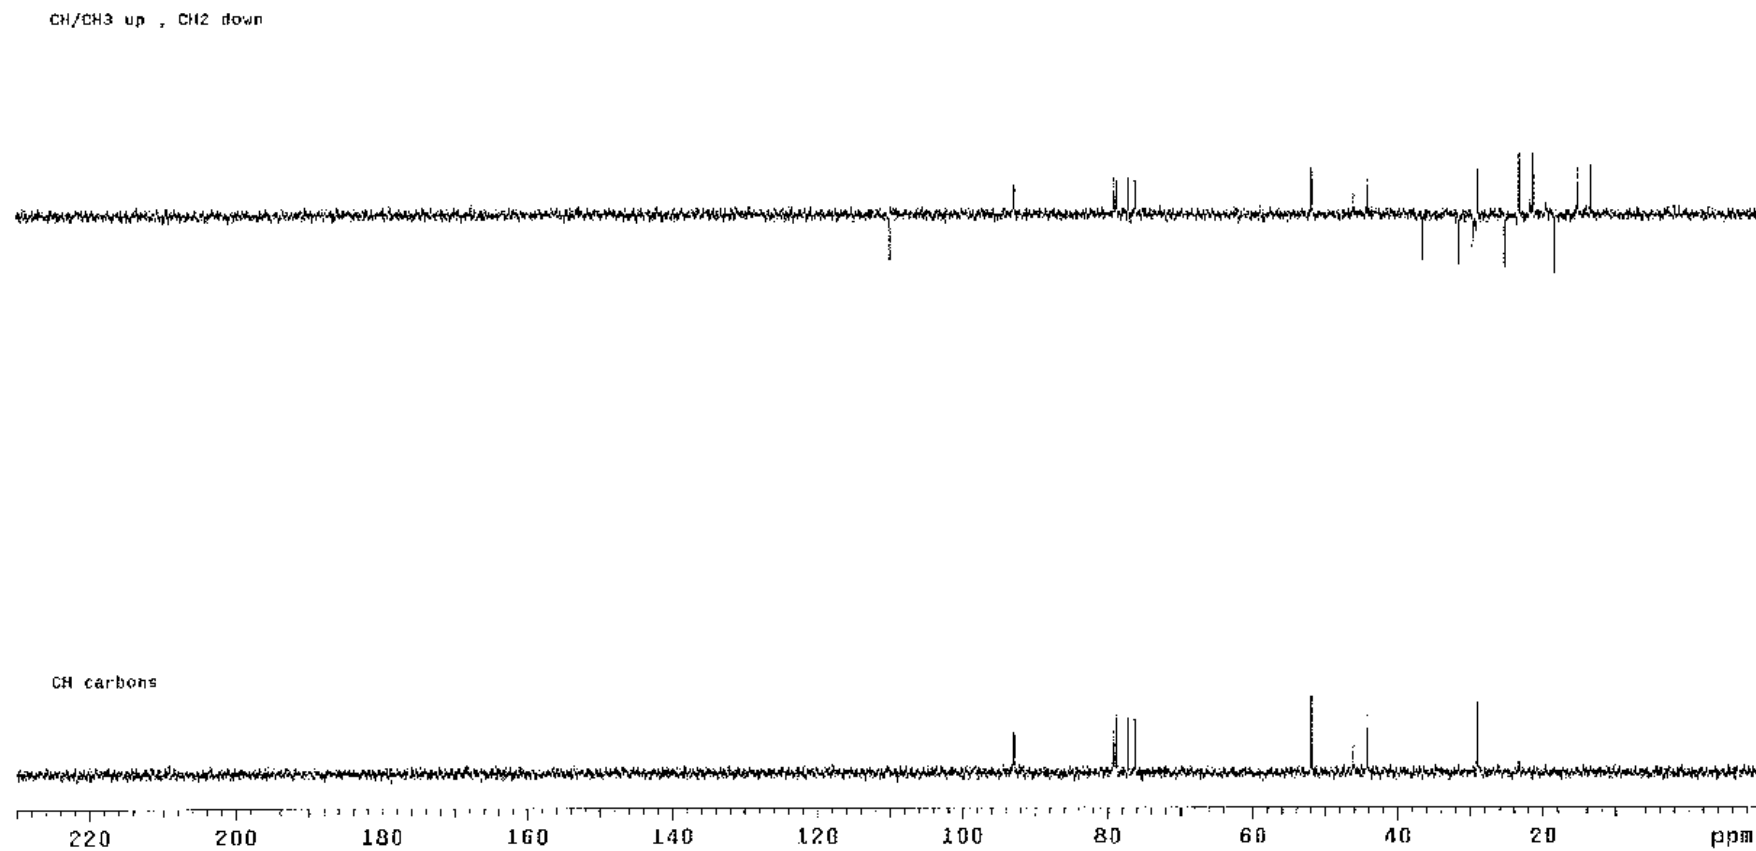

**Figure S4.** HSQC spectrum (500 MHz) of compound **1** in  $\text{CDCl}_3$ .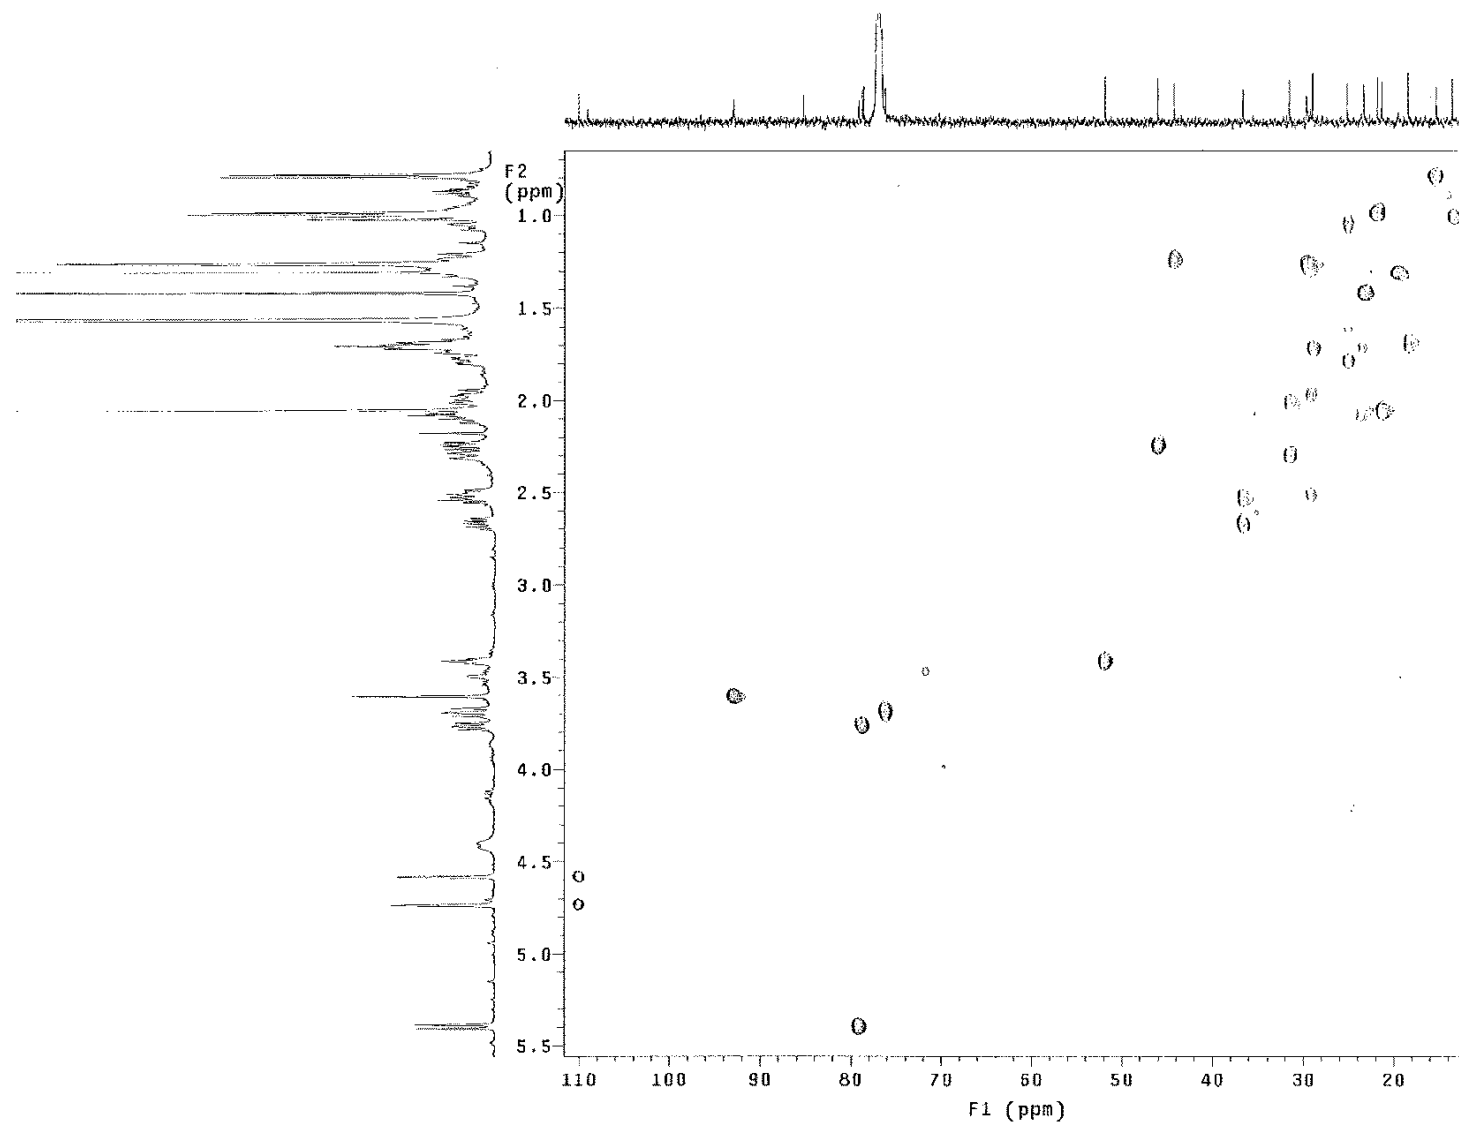

QC

**Figure S5.** HMBC spectrum (500 MHz) of compound **1** in CDCl<sub>3</sub>.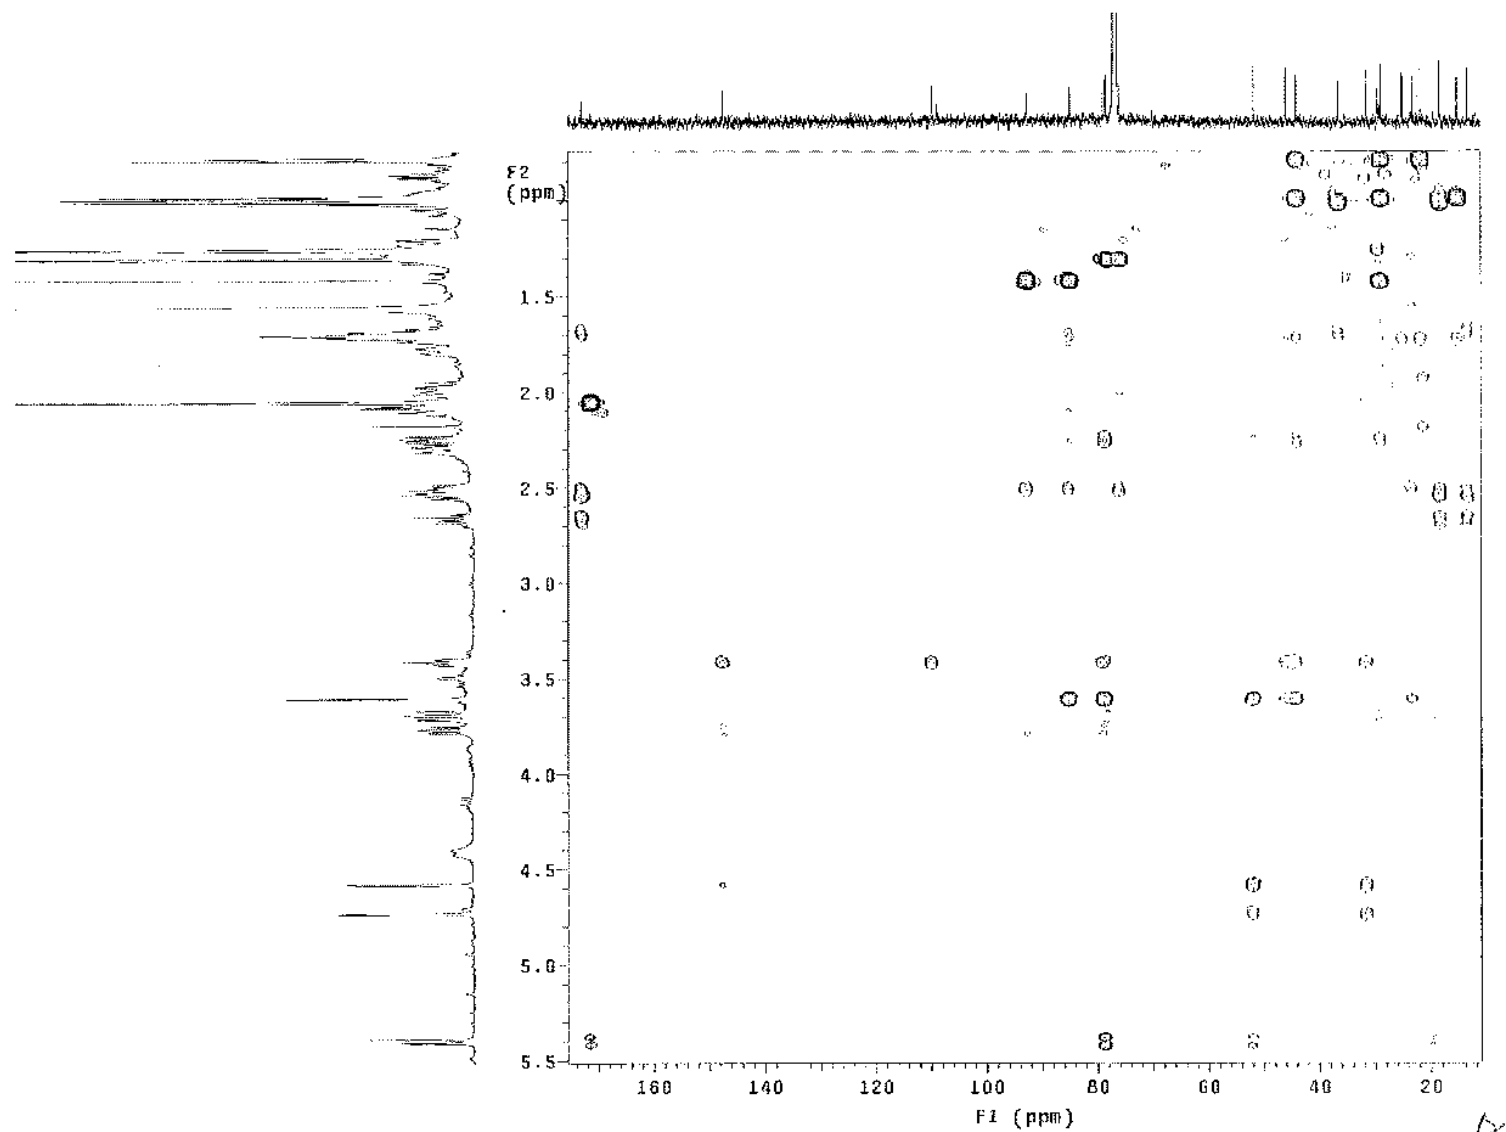

**Figure S6.** COSY spectrum (500 MHz) of compound **1** in CDCl<sub>3</sub>.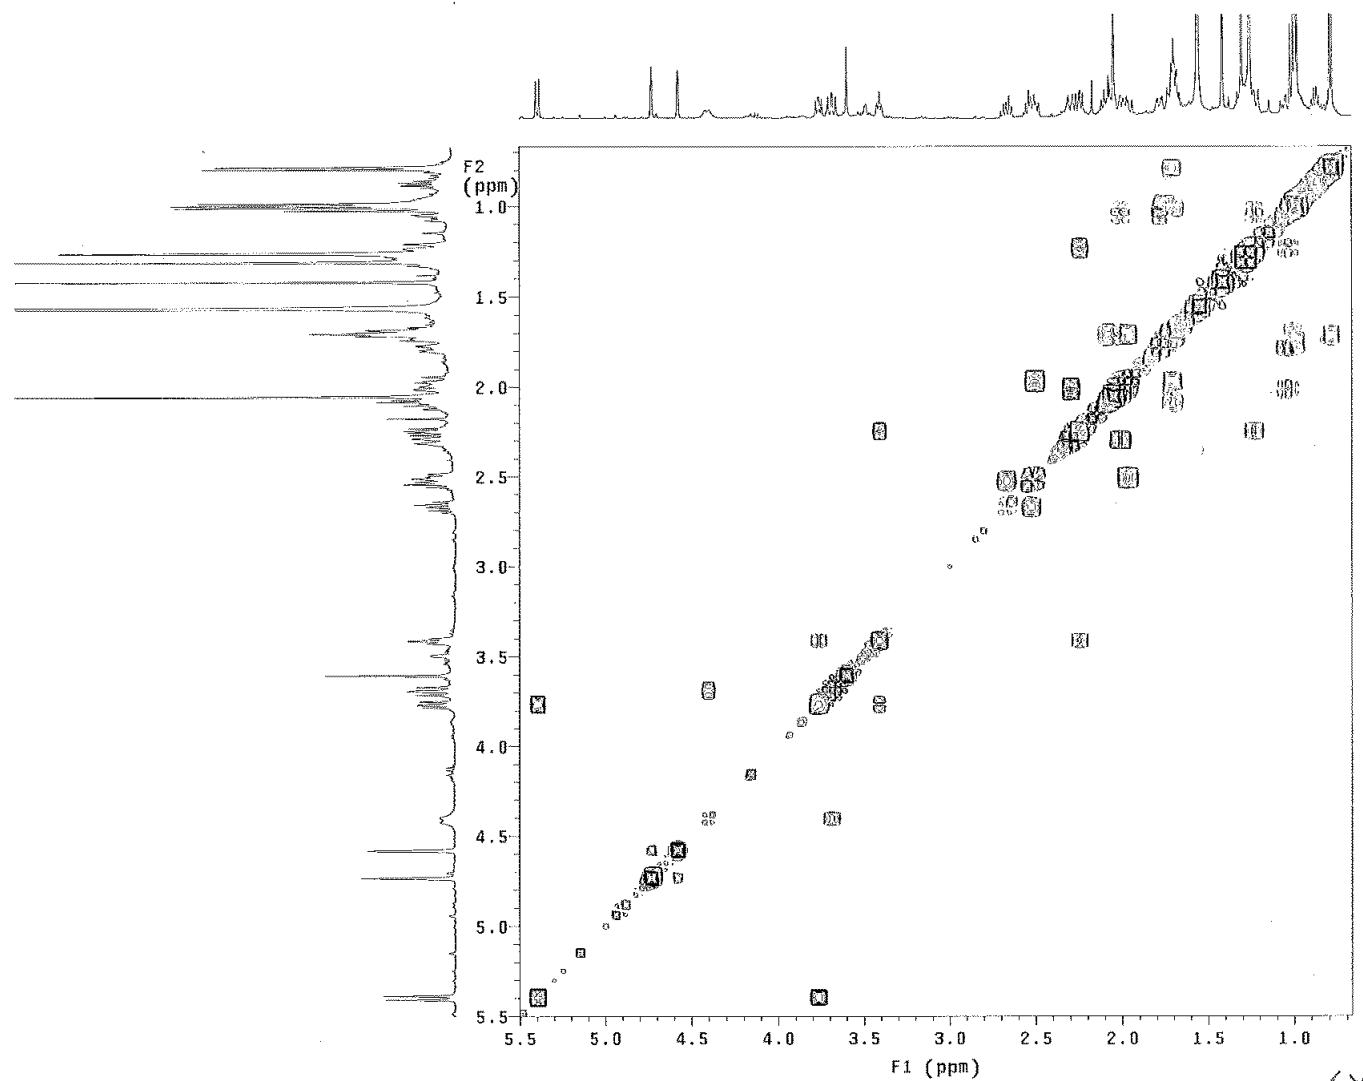

**Figure S7.** NOESY spectrum (500 MHz) of compound **1** in CDCl<sub>3</sub>.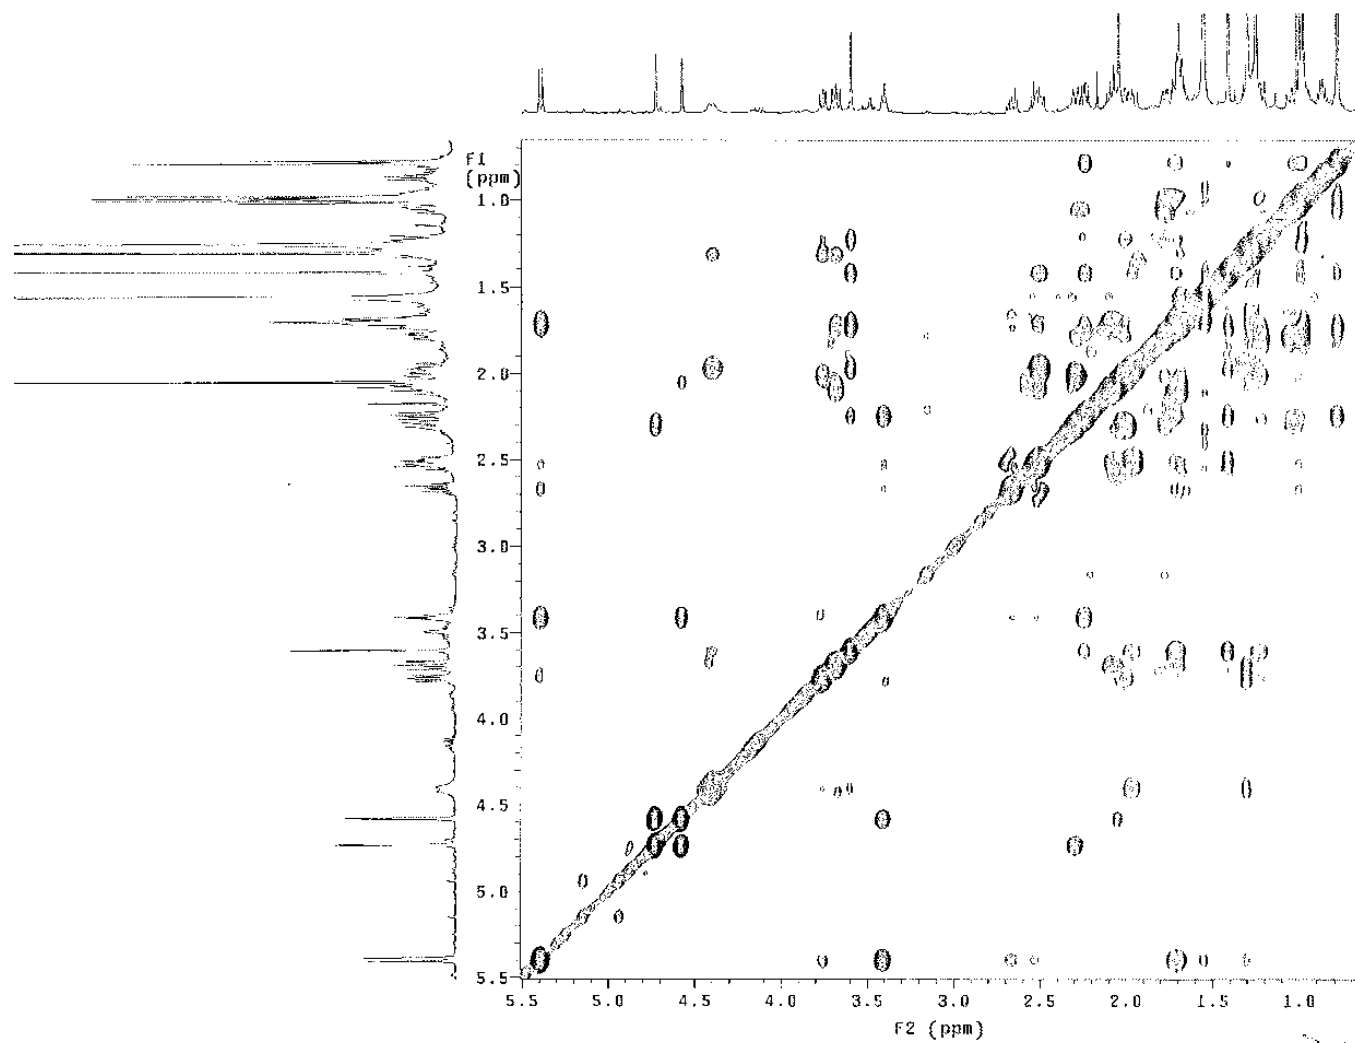

NOESY

**Figure S8.** LRESIMS spectrum of compound 1.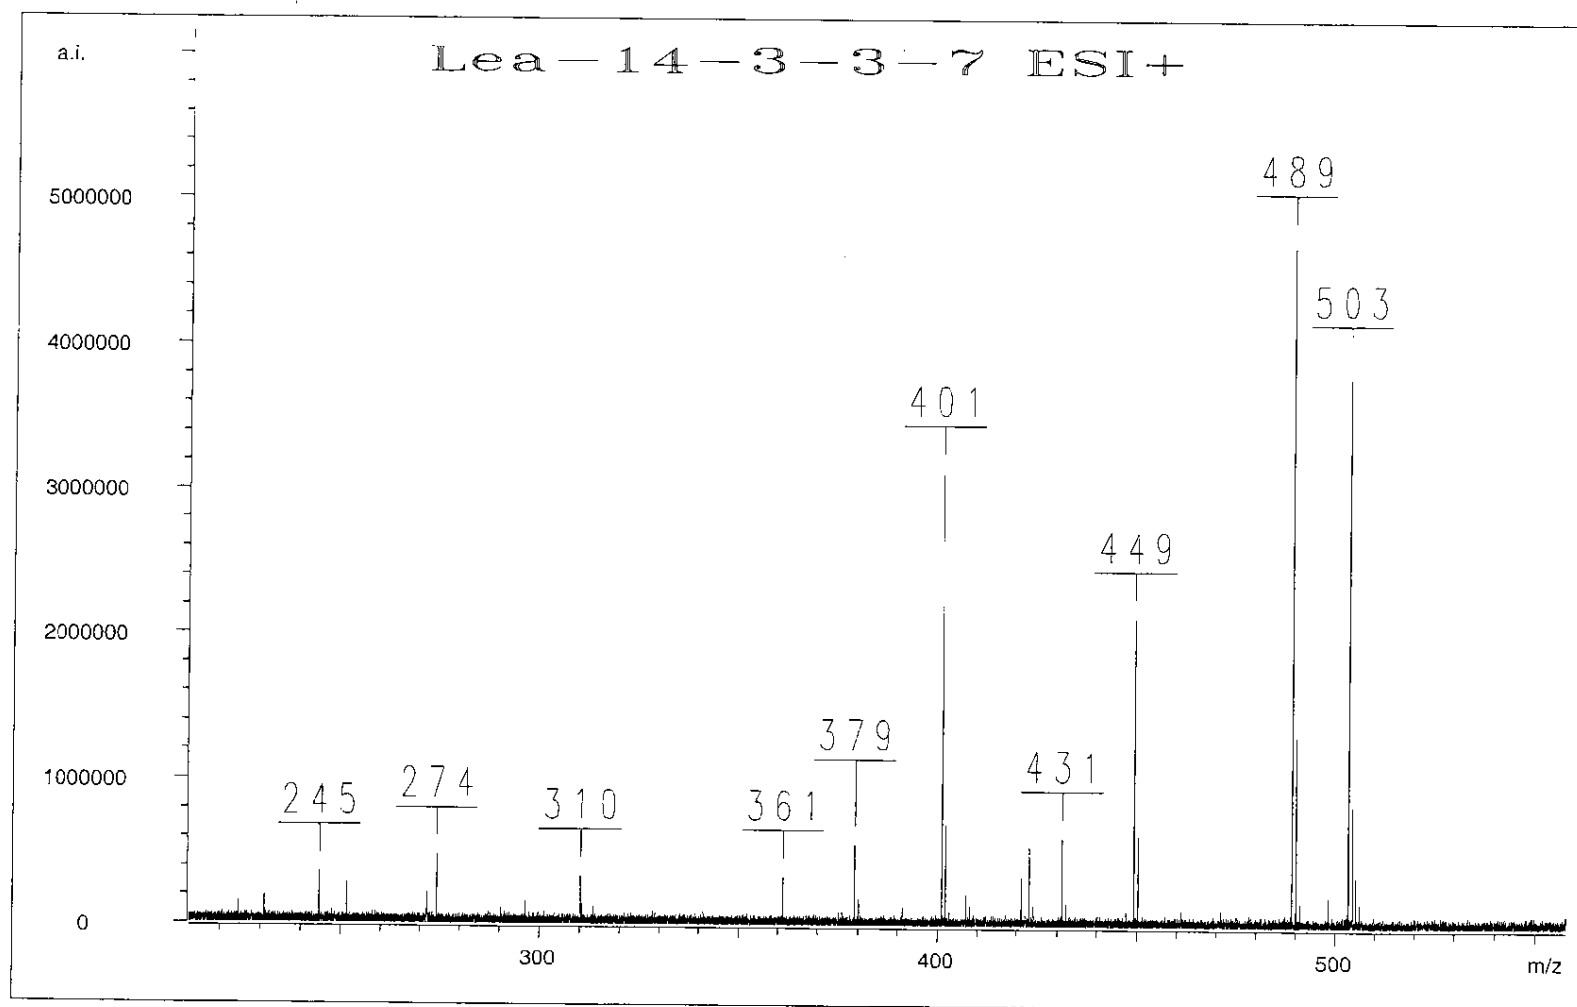

/d=/Data/yl/lea14337/3/pdata/1 Administrator Fri Jul 12 13:54:14 2013

**Figure S9.** HRESIMS spectrum of compound 1.

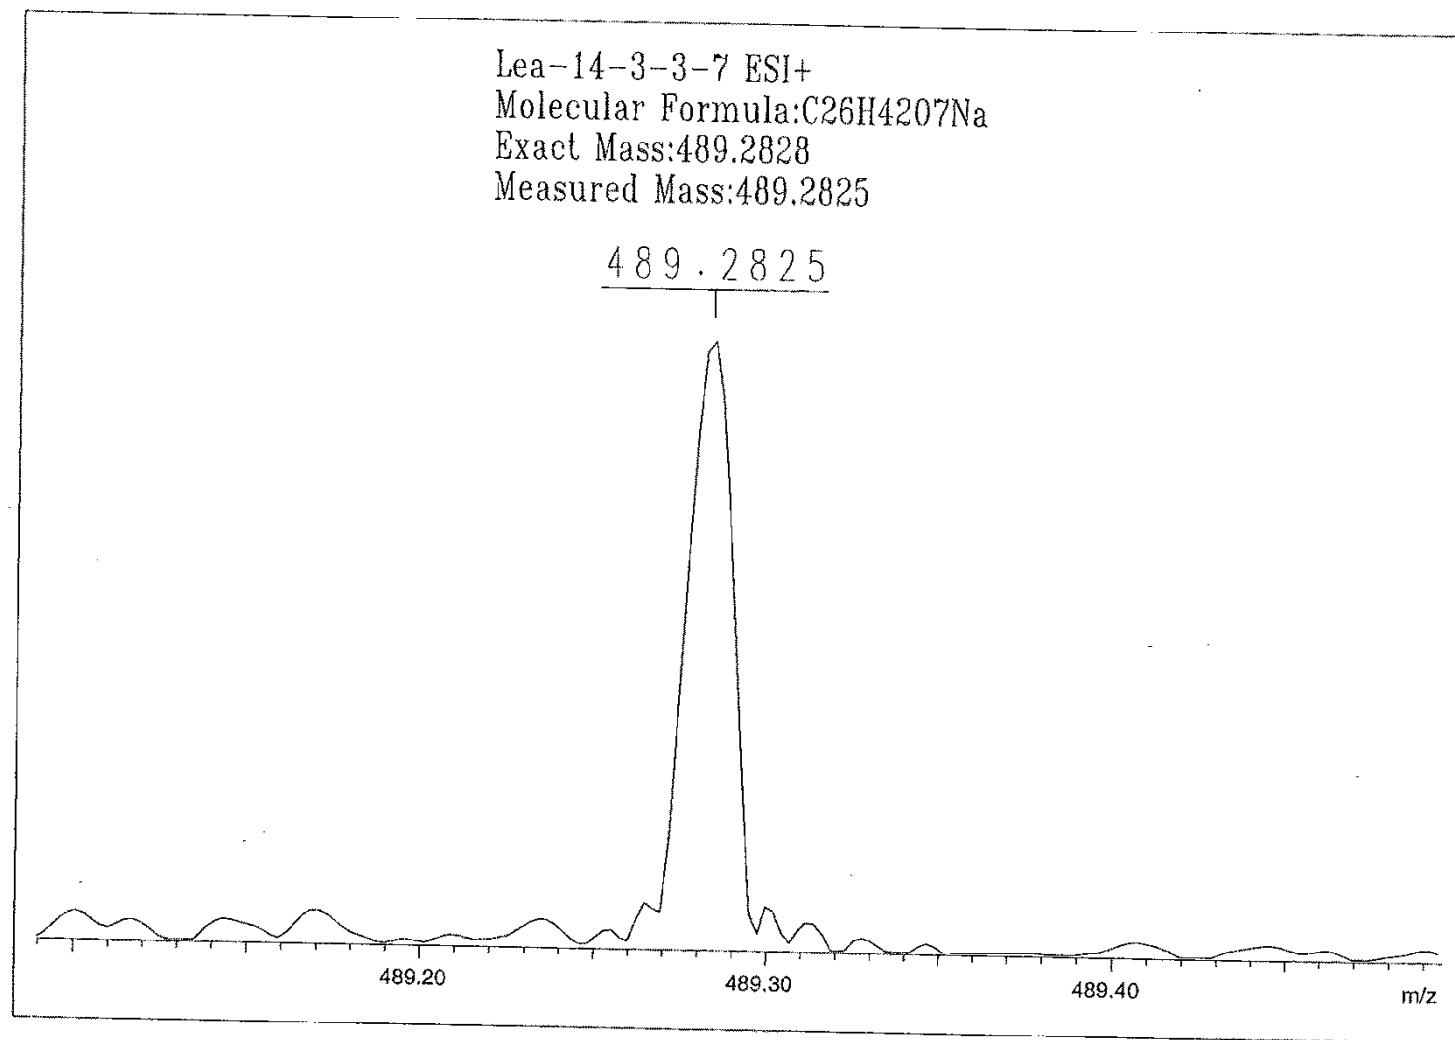

**Figure S10.**  $^1\text{H}$  NMR spectrum (400 MHz) of compound **2** in  $\text{CDCl}_3$ .

Lea-14-4-5-11-2  
Sequence Name:  
PROTON

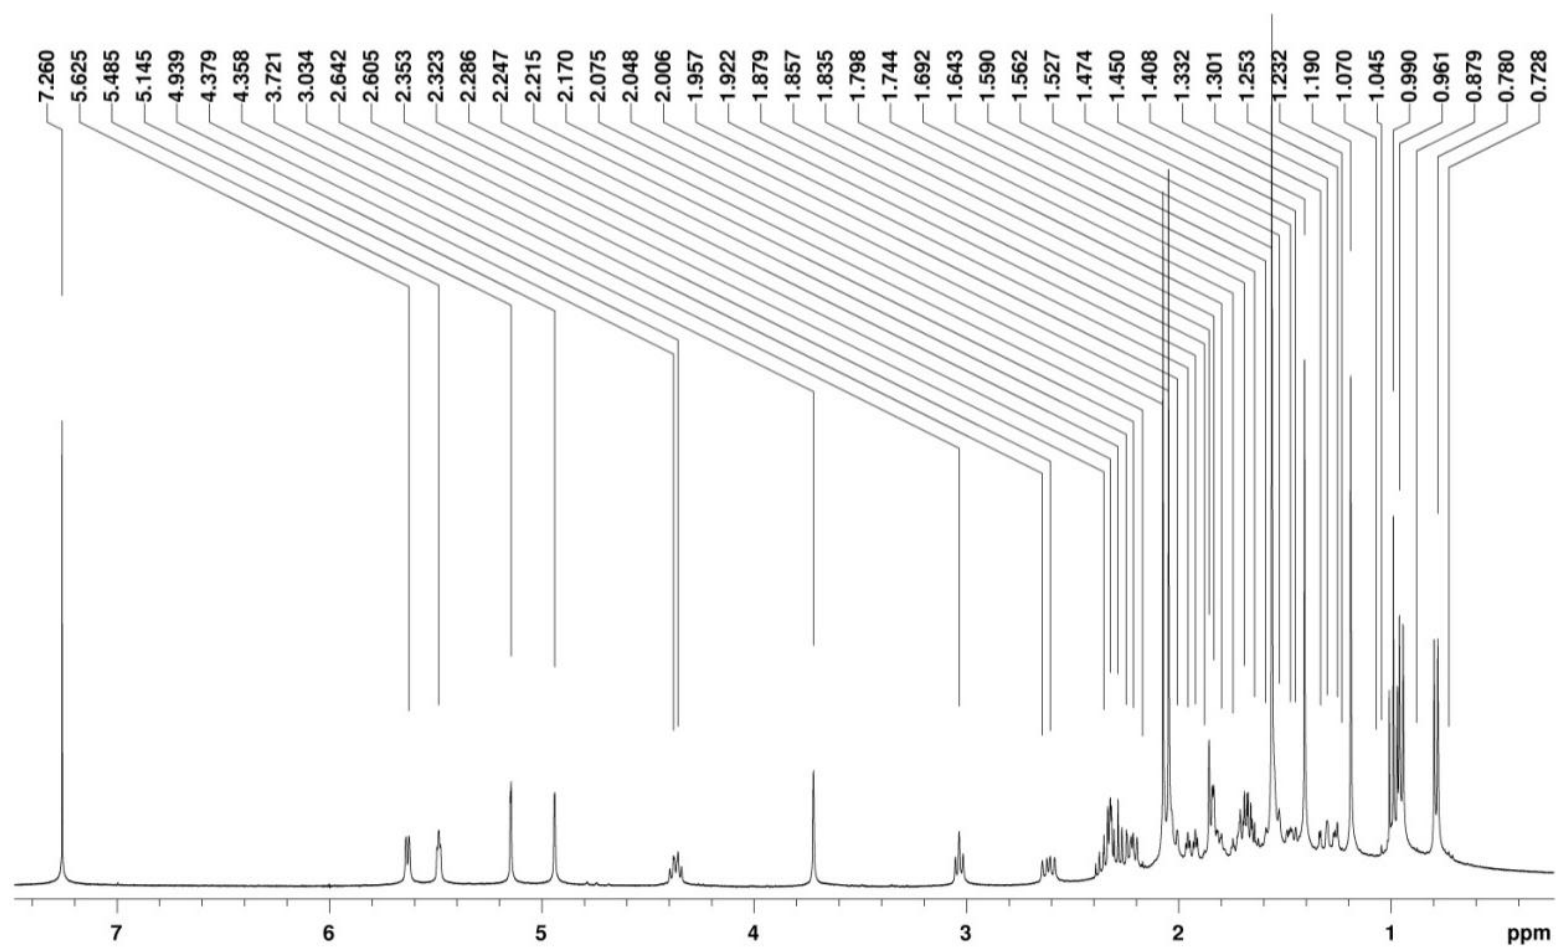

**Figure S11.**  $^{13}\text{C}$  NMR spectrum (100 MHz) of compound **2** in  $\text{CDCl}_3$ .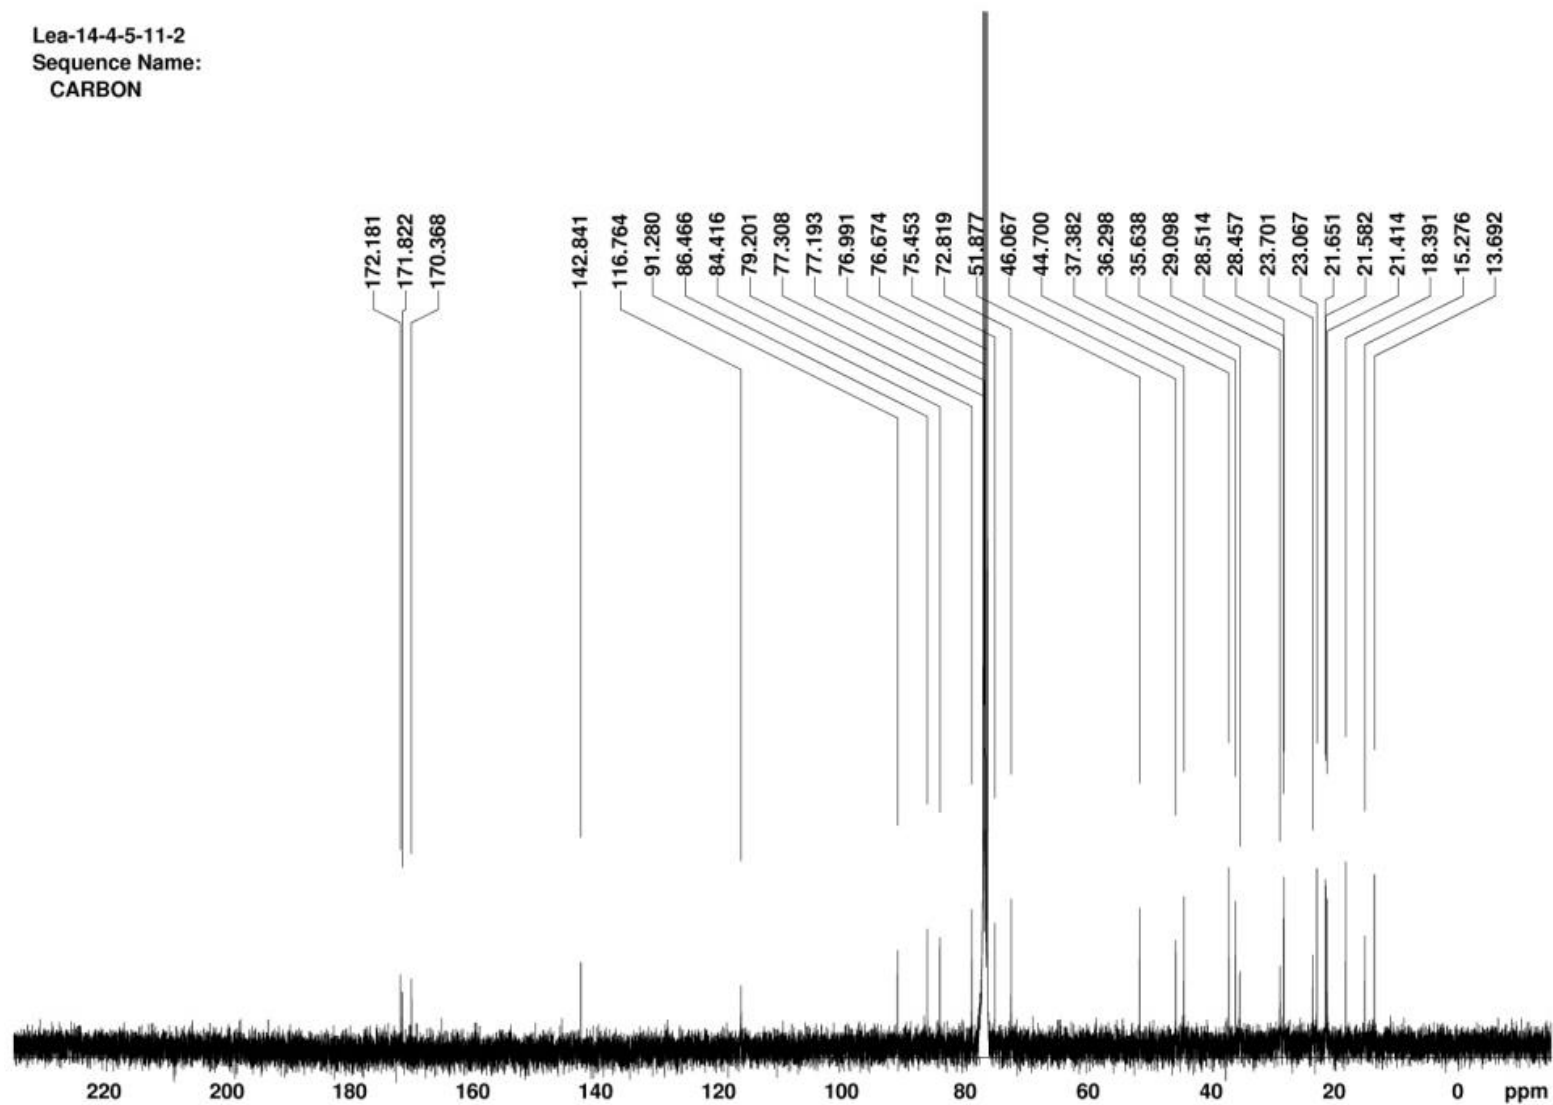

**Figure S12.** LRESIMS spectrum of compound 2.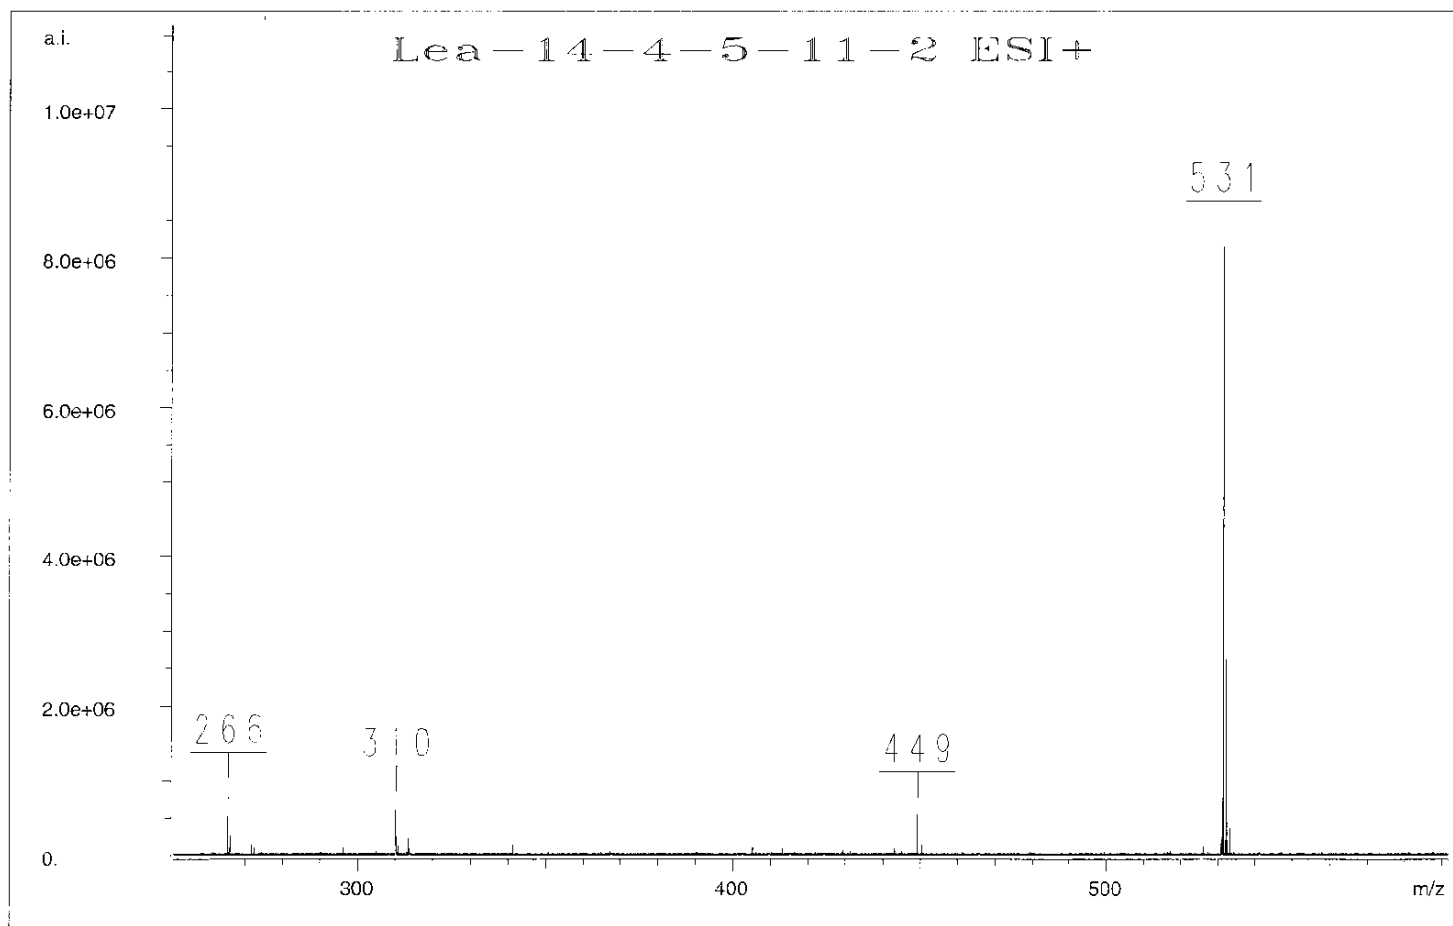

/d=/Data/yy/LEA1445112/2/pdata/1 Administrator Thu Aug 15 15:05:17 2013

**Figure S13.** HRESIMS spectrum of compound 2.

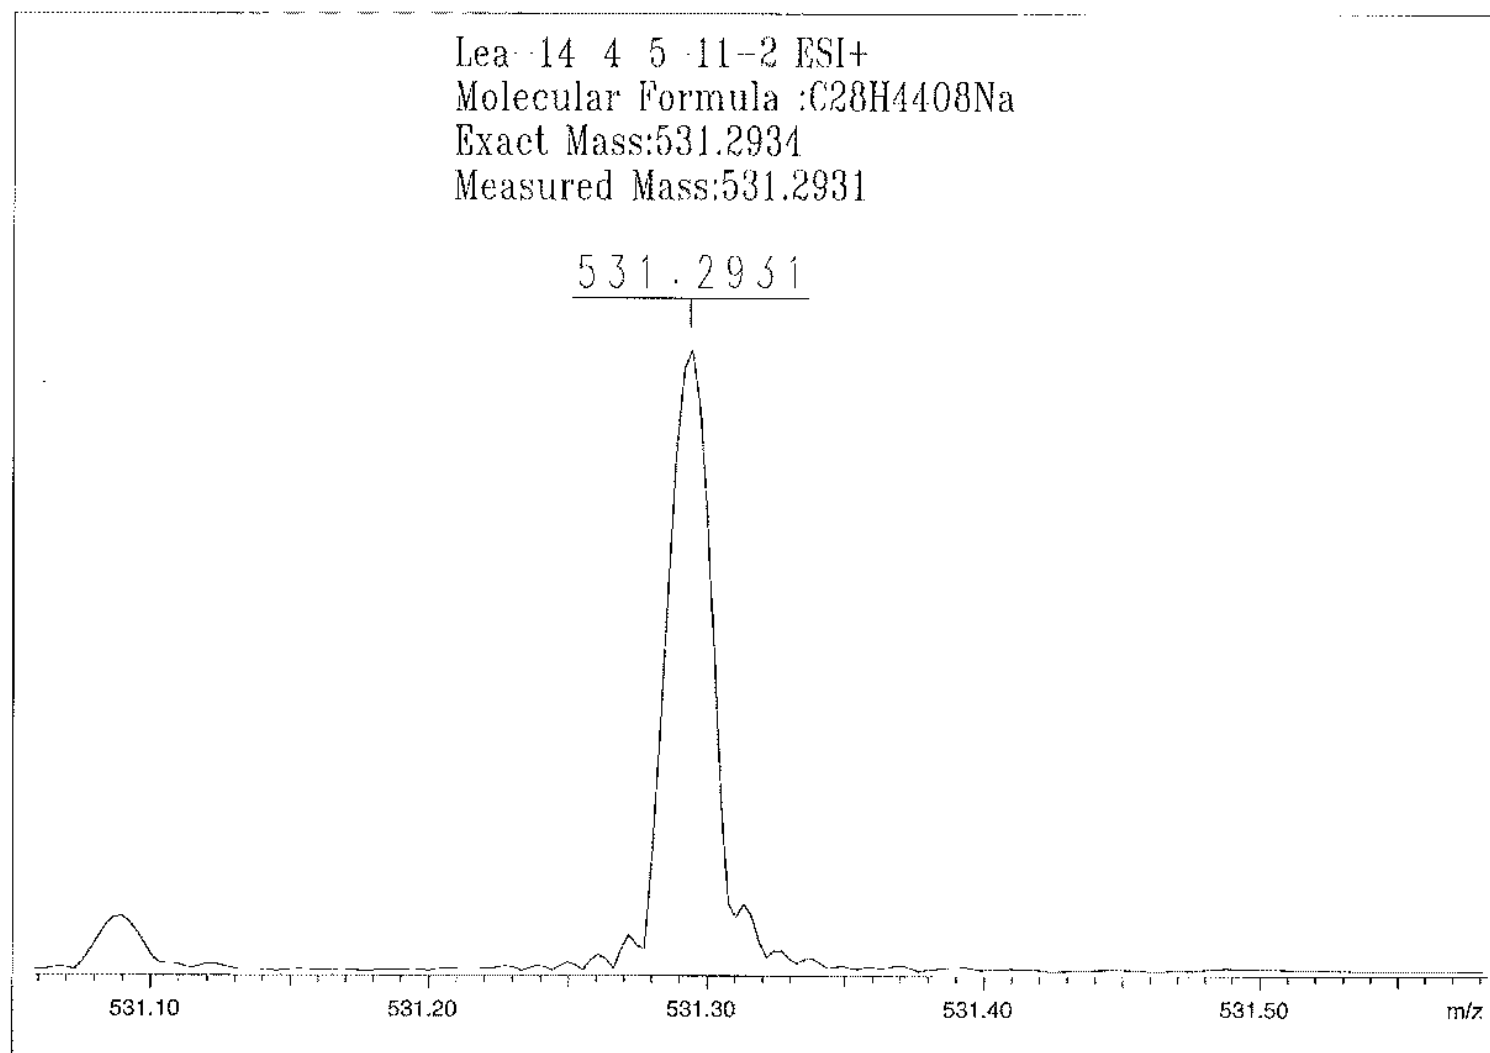

Supplement: Supplementary File 1 — Supplementary Materials (PDF, 339 KB) [file marinedrugs-11-04585-s001.pdf]
